# Supplementary material
Source: Springer Nature journal article supplement (https://www.springermedizin.de/resource/supplementary/12913_2005_205_MOESM1_ESM.pdf/9534562)
Supplement: MOESM1 [file 9534562]

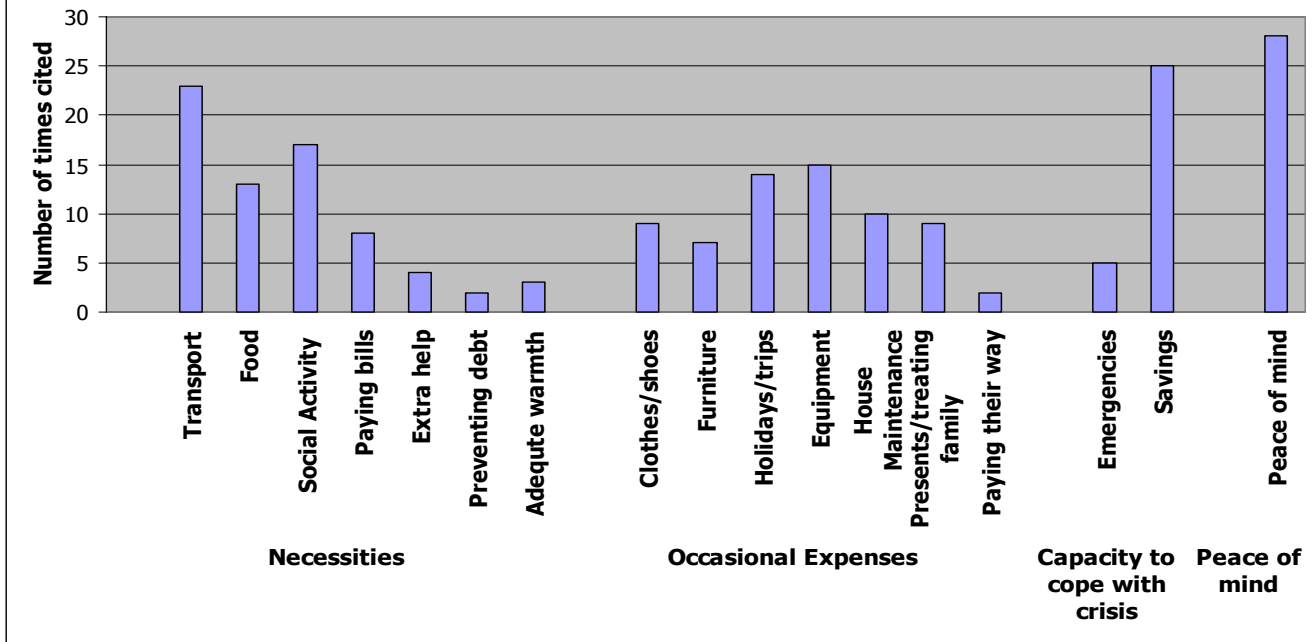

\* Reasons for no interview

- 5 interviewed by JM prior to decision being taken to record interview, however 3 of these cases were interviewed by SM at follow up and these data were included in the analysis
- 2 said they had not received any benefits as a result of taking part in the study
- 2 lost due to technical problems
- 1 was unwell
- 1 was too tired
- 1 too confused
